# Supplementary material for: The Effect of Integrated Care Management on Dementia in Atrial Fibrillation
Source: PubMed Central journal article supplement (PMC7356978; doi:10.3390/jcm9061696), 2020-06-02
Supplement: jcm-09-01696-s001.pdf [file jcm-09-01696-s001.pdf]

## Supplementary Materials

**Supplementary Table 1.** Definitions and ICD-10 codes used for defining the comorbidities and clinical outcomes.

|                                                       | <b>Definitions</b>                                                                                     | <b>ICD-10 codes or conditions</b>                                                                                                |
|-------------------------------------------------------|--------------------------------------------------------------------------------------------------------|----------------------------------------------------------------------------------------------------------------------------------|
| Atrial fibrillation <sup>1</sup>                      | Defined from diagnosis*                                                                                | I48                                                                                                                              |
| Heart failure <sup>2</sup>                            | Defined from diagnosis*                                                                                | ICD-10: I11.0, I50, I97.1                                                                                                        |
| Diabetes mellitus <sup>2</sup>                        | Defined from diagnosis* plus treatment                                                                 | ICD-10: E10, E11, E12, E13, E14<br>Treatment: all kinds of oral antidiabetics and insulin.                                       |
| Myocardial infarction <sup>3</sup>                    | Defined from diagnosis*                                                                                | ICD-10: I21, I22, I25.2                                                                                                          |
| Peripheral arterial disease <sup>2</sup>              | Defined from diagnosis*                                                                                | ICD-10: I70.0, I70.1, I70.2, I70.8, I70.9                                                                                        |
| Chronic kidney disease <sup>2</sup>                   | Defined from eGFR or diagnosis*<br>(if laboratory value was not available,<br>diagnosis code was used) | eGFR <60mL/min per 1.73 m <sup>2</sup><br>ICD-10: N18, N19                                                                       |
| Dyslipidemia <sup>2</sup>                             | Defined from diagnosis*                                                                                | ICD-10: E78                                                                                                                      |
| Hypertension <sup>2</sup>                             | Defined from diagnosis*                                                                                | I10, I11, I12, I13, I15 and antihypertensive medication                                                                          |
| TIA <sup>2</sup>                                      | Defined from diagnosis*                                                                                | G45                                                                                                                              |
| Arterial embolism <sup>2</sup>                        | Defined from diagnosis*                                                                                | I74, N280                                                                                                                        |
| Chronic Liver disease                                 | Defined from diagnosis of chronic liver<br>disease, cirrhosis, and hepatitis                           | B18, K70, K71, K72, K73, K74, K76.1                                                                                              |
| Chronic obstructive pulmonary<br>disease <sup>4</sup> | Defined from diagnosis* plus treatment                                                                 | J42, J43(except J43.0), J44<br>Treatment: SABA, SAMA, LABA, LAMA, ICS, ICS+LABA,<br>or methylxanthine (>1 months).               |
| Malignancy                                            | Defined from diagnoses of cancer (non-<br>benign)                                                      | C00-C97                                                                                                                          |
| ESRD <sup>5</sup>                                     | Defined from national registry for severe<br>illness.                                                  | Patients with ESRD undergoing chronic dialysis or received<br>a kidney transplant.                                               |
| Ischemic stroke <sup>1,6</sup>                        | Defined from any discharge diagnoses with<br>concomitant imaging studies                               | ICD-10: I63, I64 with concomitant brain-imaging studies,<br>including computed tomography or magnetic resonance<br>imaging.      |
| Intracranial hemorrhage <sup>7</sup>                  | Defined from any discharge diagnoses with<br>concomitant imaging studies                               | ICD-10: I60, I61, I62 with concomitant brain-imaging studies,<br>including computed tomography or magnetic resonance<br>imaging. |

|                                                          |                                                   |                                                                              |
|----------------------------------------------------------|---------------------------------------------------|------------------------------------------------------------------------------|
| Gastrointestinal bleeding <sup>3</sup>                   | Defined from admission diagnosis or related death | K25-28 (subcodes 0-2 and 4-6 only), K92.0, K92.1, K92.2, K62.5, I85.0, I98.3 |
| Respiratory or urinary tract bleeding, etc. <sup>3</sup> | Defined from admission diagnosis or related death | N02, R31, R04, J942, K661, D62                                               |

\*To ensure accuracy, comorbidities were established based on one inpatient or two outpatient records of ICD-10 codes in the database. †To avoid erroneous inclusion of the patients with non-cardiac arrest, we excluded the patient with sudden arrest diagnosis accompanied by respiratory arrest (R09.0, R09.2), gastrointestinal bleeding (I85.0, K25.0, K25.4, K26.0, K26.4, K27.0, K27.4, K92.0-K92.2), brain hemorrhage (I60.x-I62.x, S06.4-S06.6), septic shock (A41.9, R57.2), pregnancy and delivery (O00-O99), diabetic ketoacidosis (E14.1), anaphylaxis (T78.2), and accidents including suicide (T71, T75.1, T36-T65, V80-V89, W76.x, X60-X84). eGFR = estimated glomerular filtration rate; ICD-10 = International Classification of Diseases-10th Revision. All covariates were validated in cited references.

**Supplementary Table 2.** Comparison of baseline characteristics between atrial fibrillation patients compliant with and without ABC pathway.

|                                              | ≥ 70 years            |                  |         | ≥ 60 and <70 years    |                  |         | ≥ 50 and <60 years    |                   |         | <50 years             |                   |         |
|----------------------------------------------|-----------------------|------------------|---------|-----------------------|------------------|---------|-----------------------|-------------------|---------|-----------------------|-------------------|---------|
|                                              | Non-ABC<br>(n=56,223) | ABC<br>(n=1,257) | P-value | Non-ABC<br>(n=60,417) | ABC<br>(n=6,656) | P-value | Non-ABC<br>(n=41,363) | ABC<br>(n=14,798) | P-value | Non-ABC<br>(n=24,029) | ABC<br>(n=23,283) | P-value |
| Age, years                                   | 74 (72, 78)           | 74 (72, 77)      | 0.001   | 65 (62, 67)           | 62 (61, 64)      | <0.001  | 55 (53, 57)           | 54 (52, 57)       | <0.001  | 44 (39, 47)           | 41 (34, 45)       | <0.001  |
| Female                                       | 25514<br>(45.4)       | 450<br>(35.8)    | <0.001  | 24187 (40)            | 2498<br>(37.5)   | <0.001  | 14236<br>(34.4)       | 6095<br>(41.2)    | <0.001  | 6281<br>(26.1)        | 8973<br>(38.5)    | <0.001  |
| Economic status                              | 14 (6,18)             | 15 (9,18)        | <0.001  | 12 (5,17)             | 12 (5,17)        | 0.05    | 12 (5,17)             | 13 (6,18)         | <0.001  | 13 (6,17)             | 13 (7,17)         | 0.263   |
| CHA <sub>2</sub> DS <sub>2</sub> -VASc score | 3 (2, 4)              | 3 (2, 4)         | <0.001  | 2 (1, 3)              | 1 (0, 1)         | <0.001  | 1 (1, 2)              | 0 (0, 1)          | <0.001  | 1 (0, 2)              | 0 (0, 1)          | <0.001  |
| mHAS-BLED score*                             | 1 (0, 2)              | 0 (0, 1)         | 0.396   | 2 (1, 3)              | 0 (0, 1)         | <0.001  | 1 (1, 2)              | 0 (0, 1)          | <0.001  | 1 (0, 2)              | 0 (0, 1)          | <0.001  |
| Charlson comorbidity index                   | 3 (2, 5)              | 3 (1, 5)         | <0.001  | 3 (1, 4)              | 2 (1, 3)         | <0.001  | 2 (1, 4)              | 1 (1, 2)          | <0.001  | 2 (1, 3)              | 1 (0, 2)          | <0.001  |
| Heart failure                                | 17810<br>(31.7)       | 215<br>(17.1)    | <0.001  | 13639<br>(22.6)       | 231 (3.5)        | <0.001  | 7159<br>(17.3)        | 137 (0.9)         | <0.001  | 2949<br>(12.3)        | 44 (0.2)          | <0.001  |

|                        |                 |                |             |                 |                |        |                 |                |             |                 |                |        |
|------------------------|-----------------|----------------|-------------|-----------------|----------------|--------|-----------------|----------------|-------------|-----------------|----------------|--------|
| Hypertension           | 39939<br>(71.0) | 886<br>(70.5)  | 0.693       | 40160<br>(66.5) | 929<br>(14.0)  | <0.001 | 25988<br>(62.8) | 473 (3.2)      | <0.001<br>1 | 11601<br>(48.3) | 137 (0.6)      | <0.001 |
| Diabetes               | 12070<br>(21.5) | 301<br>(23.9)  | 0.038       | 12739<br>(21.1) | 315 (4.7)      | <0.001 | 8086<br>(19.5)  | 153 (1.0)      | <0.001<br>1 | 2924<br>(12.2)  | 38 (0.2)       | <0.001 |
| Myocardial infarction  | 4565 (8.1)      | 35 (2.8)       | <0.001<br>1 | 4185 (6.9)      | 63 (0.9)       | <0.001 | 2703 (6.5)      | 43 (0.3)       | <0.001<br>1 | 1385 (5.8)      | 16 (0.1)       | <0.001 |
| Vascular disease       | 10128<br>(18.0) | 131<br>(10.4)  | <0.001<br>1 | 9433<br>(15.6)  | 140 (2.1)      | <0.001 | 5590<br>(13.5)  | 81 (0.5)       | <0.001<br>1 | 2338 (9.7)      | 31 (0.1)       | <0.001 |
| Chronic kidney disease | 2400 (4.3)      | 38 (3.0)       | 0.036       | 1852 (3.1)      | 80 (1.2)       | <0.001 | 1230 (3.0)      | 116 (0.8)      | <0.001<br>1 | 607 (2.5)       | 124 (0.5)      | <0.001 |
| Liver disease          | 20460<br>(36.4) | 437<br>(34.8)  | 0.248       | 24262<br>(40.2) | 2189<br>(32.9) | <0.001 | 17391<br>(42.0) | 4757<br>(32.1) | <0.001<br>1 | 8861<br>(36.9)  | 5982<br>(25.7) | <0.001 |
| Malignancy             | 14502<br>(25.8) | 313<br>(24.9)  | 0.494       | 12712<br>(21.0) | 1376<br>(20.7) | 0.495  | 6871<br>(16.6)  | 2567<br>(17.3) | 0.041       | 2683<br>(11.2)  | 2620<br>(11.3) | 0.775  |
| Hyperthyroidism        | 3881 (6.9)      | 102 (8.1)      | 0.106       | 5179 (8.6)      | 369 (5.5)      | <0.001 | 4242<br>(10.3)  | 1075 (7.3)     | <0.001<br>1 | 2819<br>(11.7)  | 1952<br>(8.4)  | <0.001 |
| Hypothyroidism         | 4072 (7.2)      | 116 (9.2)      | 0.009       | 4746 (7.9)      | 389 (5.8)      | <0.001 | 3364 (8.1)      | 929 (6.3)      | <0.001<br>1 | 1688 (7.0)      | 1195<br>(5.1)  | <0.001 |
| COPD                   | 12765<br>(22.7) | 214<br>(17.0)  | <0.001<br>1 | 7382<br>(12.2)  | 536 (8.1)      | <0.001 | 2336 (5.6)      | 592 (4.0)      | <0.001<br>1 | 550 (2.3)       | 393 (1.7)      | <0.001 |
| History of bleeding    | 4840 (8.6)      | 82 (6.5)       | 0.01        | 4050 (6.7)      | 304 (4.6)      | <0.001 | 2424 (5.9)      | 575 (3.9)      | <0.001<br>1 | 1211 (5.0)      | 706 (3.0)      | <0.001 |
| Medication             |                 |                |             |                 |                |        |                 |                |             |                 |                |        |
| OAC (Baseline)         | 1777 (3.2)      | 230<br>(18.3)  | <0.001<br>1 | 2150 (3.6)      | 368 (5.5)      | <0.001 | 1198 (2.9)      | 302 (2.0)      | <0.001<br>1 | 697 (2.9)       | 266 (1.1)      | <0.001 |
| OAC (Follow-up)        | 15411<br>(27.4) | 1254<br>(99.8) | <0.001<br>1 | 17390<br>(28.8) | 2243<br>(33.7) | <0.001 | 9674<br>(23.4)  | 2324<br>(15.7) | <0.001<br>1 | 4094<br>(17.0)  | 1884<br>(8.1)  | <0.001 |
| Antiplatelet agents    | 24727<br>(44.0) | 565<br>(44.9)  | 0.512       | 24948<br>(41.3) | 773<br>(11.6)  | <0.001 | 13922<br>(33.7) | 669 (4.5)      | <0.001<br>1 | 4544<br>(18.9)  | 332 (1.4)      | <0.001 |
| Beta blocker           | 19208<br>(34.2) | 414<br>(32.9)  | 0.38        | 20516<br>(34.0) | 677<br>(10.2)  | <0.001 | 13218<br>(32.0) | 756 (5.1)      | <0.001<br>1 | 6206<br>(25.8)  | 947 (4.1)      | <0.001 |
| Statin                 | 14212           | 404            | <0.001      | 16448           | 797            | <0.001 | 10207           | 1122 (7.6)     | <0.001      | 3359            | 468 (2.0)      | <0.001 |

|                       |                 |               |            |                 |           |        |                 |           |            |                |           |        |
|-----------------------|-----------------|---------------|------------|-----------------|-----------|--------|-----------------|-----------|------------|----------------|-----------|--------|
|                       | (25.3)          | (32.1)        | 1          | (27.2)          | (12.0)    |        | (24.7)          |           | 1          | (14.0)         |           |        |
| CCB                   | 25701<br>(45.7) | 590<br>(46.9) | <0.00<br>1 | 24641<br>(40.8) | 598 (9.0) | <0.001 | 14338<br>(34.7) | 336 (2.3) | <0.00<br>1 | 5017<br>(20.9) | 140 (0.6) | <0.001 |
| ACE-<br>inhibitor/ARB | 23330<br>(41.5) | 563<br>(44.8) | 0.021      | 23099<br>(38.2) | 613 (9.2) | <0.001 | 14515<br>(35.1) | 324 (2.2) | <0.00<br>1 | 5589<br>(23.3) | 105 (0.5) | <0.001 |
| AAD†                  | 1731 (3.1)      | 42 (3.3)      | 0.653      | 2597 (4.3)      | 129 (1.9) | <0.001 | 1763 (4.3)      | 189 (1.3) | <0.00<br>1 | 996 (4.1)      | 184 (0.8) | <0.001 |

AAD=antiarrhythmic drugs, ACE=angiotensin converting enzyme, AF=atrial fibrillation, ARB=angiotensin II receptor blocker, CCB=calcium channel blocker, COPD=Chronic obstructive pulmonary disease, OAC=oral anticoagulants. \*Modified HASBLED=hypertension, 1 point; >65 years old, 1 point; stroke history, 1 point; bleeding history or predisposition, 1 point; liable international normalized ratio, not assessed; ethanol or drug abuse, 1 point; drug predisposing to bleeding, 1 point. †Antiarrhythmic drugs included class Ic arrhythmic drugs (eg. flecainide, propafenone, pilicainide), and class III drugs (eg. sotalol, dronedarone, amiodarone). Values are presented as numbers (%) or median (Q1, Q3, quartiles [25th and 75th percentiles]).

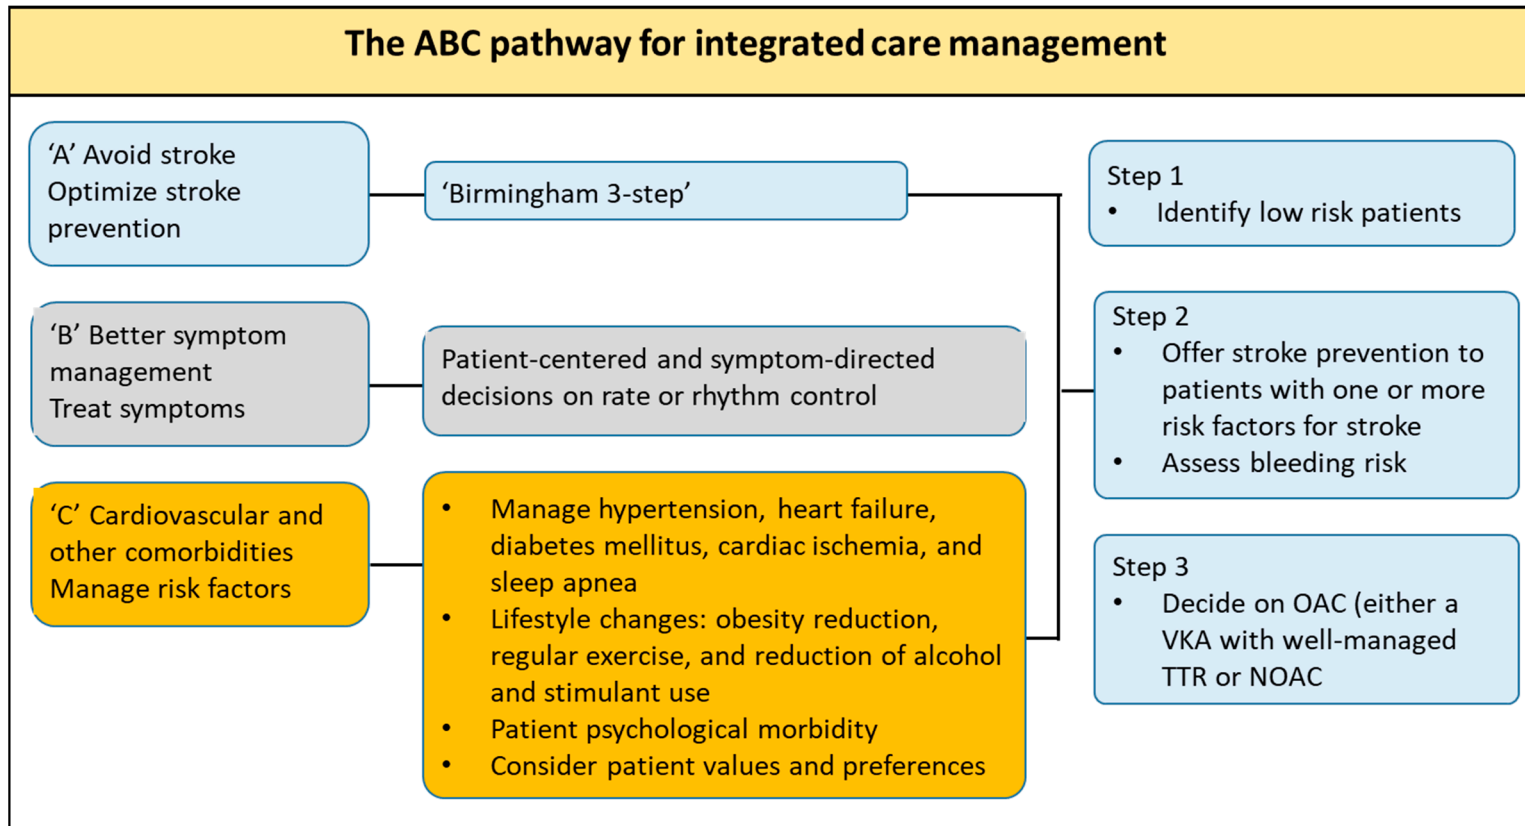

**Supplementary Figure 1.** The ABC pathway for integrated care management.
